# Supplementary material for: Assessment of transparent and reproducible research practices in the psychiatry literature
Source: PubMed Central journal article supplement — Gen Psychiatr. 2020 Feb 12;33(1):e100149. doi: 10.1136/gpsych-2019-100149 (PMC7047471; doi:10.1136/gpsych-2019-100149), 2020-02-12
Supplement: gpsych-2019-100149supp001.pdf [file gpsych-2019-100149supp001.pdf]

**Supplemental Table A:** Additional Reproducibility Characteristics

| <b>Characteristics</b>                |                                                              | <b>Variables</b> |
|---------------------------------------|--------------------------------------------------------------|------------------|
|                                       |                                                              | <b>No. (%)</b>   |
| <b>Type of Study</b>                  | No empirical                                                 | 69 (23.3)        |
|                                       | Meta-analysis                                                | 26 (8.8)         |
|                                       | Commentary                                                   | 0 (0)            |
|                                       | Cost effectiveness                                           | 0 (0)            |
|                                       | Clinical Trial                                               | 36 (12.2)        |
|                                       | Case Study                                                   | 7 (2.4)          |
|                                       | Case Series                                                  | 9 (3.0)          |
|                                       | Cohort                                                       | 46 (15.5)        |
|                                       | Retrospective                                                | 0 (0)            |
|                                       | Case Control                                                 | 32 (10.8)        |
|                                       | Survey                                                       | 45 (15.2)        |
|                                       | Laboratory                                                   | 8 (2.7)          |
|                                       | Multiple                                                     | 2 (0.7)          |
|                                       | Other                                                        | 16 (5.4)         |
| <b>Material availability</b>          | Personal or institutional                                    | 4                |
|                                       | Supplementary information hosted by the journal              | 3                |
|                                       | Online third party                                           | 12               |
|                                       | Upon request                                                 | 3                |
|                                       | Yes, material was accessible                                 | 17               |
|                                       | No, material was not accessible                              | 5                |
| <b>Data availability</b>              | A personal or institutional webpage                          | 1                |
|                                       | Supplementary information hosted by the journal              | 2                |
|                                       | An online third party repository (e.g., OSF, Figshare, etc.) | 0                |
|                                       | Upon request                                                 | 6                |
|                                       | Other                                                        | 5                |
|                                       | Yes, data could be accessed and downloaded                   | 2                |
|                                       | No, data could not be accessed and downloaded                | 12               |
|                                       | Yes, data files were clearly documented                      | 2                |
|                                       | No, data files were not clearly documented                   | 0                |
|                                       | Yes, data files contain all raw data                         | 1                |
|                                       | No, data files do not contain all raw data                   | 1                |
| Unclear if all raw data was available | 0                                                            |                  |
| <b>Pre-registration</b>               | Pre-registered on <i>ClinicalTrials.gov</i>                  | 7                |

|                 |                                            |    |
|-----------------|--------------------------------------------|----|
|                 | Pre-registered on Open Science Framework   | 1  |
|                 | Other                                      | 5  |
|                 | Yes, pre-registration was accessible       | 13 |
|                 | No, pre-registration was not accessible    | 0  |
|                 | Hypothesis was pre-registered              | 4  |
|                 | Methods were pre-registered                | 10 |
|                 | Analysis plan was pre-registered           | 8  |
| <b>Protocol</b> |                                            |    |
|                 | Hypothesis was included in the protocol    | 2  |
|                 | Methods were included in the protocol      | 4  |
|                 | Analysis plan was included in the protocol | 4  |

**Supplemental Table B:** Factors Analyzed. The factors examined in each article were based upon study type. Further details about extraction and coding is available at: <https://osf.io/x24n3/>

| <i>Reproducibility Factors</i>                                                   |                              | <i>Impact on research transparency and reproducibility.</i>                                                                                                                                                                                  |
|----------------------------------------------------------------------------------|------------------------------|----------------------------------------------------------------------------------------------------------------------------------------------------------------------------------------------------------------------------------------------|
| <b>Articles</b>                                                                  |                              |                                                                                                                                                                                                                                              |
| Is the publication accessible publicly or only through a paywall?                | All studies (n=300)          | Open access to publications can improve reproducibility by increasing the occurrence of replication studies, collaboration, and universal access to current findings.                                                                        |
| <b>Funding</b>                                                                   |                              |                                                                                                                                                                                                                                              |
| Does the publication indicate a funding source or lack of one?                   | All included studies (n=296) | Funding sources have an influence on the roles and practices of the investigators.                                                                                                                                                           |
| <b>Conflict of Interest</b>                                                      |                              |                                                                                                                                                                                                                                              |
| Does the publication indicate a conflict of interest or lack of one?             | All included studies (n=296) | Statements disclosing conflict of interest or funding allow the investigators to disclose or deny potential bias. Transparency of all possible conflicts of interest or funding sources promotes the validity and reliability of findings. . |
| <b>Evidence synthesis</b>                                                        |                              |                                                                                                                                                                                                                                              |
| Has the article been cited by a systematic review or meta-analysis?              | Empirical studies † (n=201)  | Citing of published studies in systematic reviews and meta-analyses is used to incorporate multiple publications and produce new assessments.                                                                                                |
| <b>Protocols</b>                                                                 |                              |                                                                                                                                                                                                                                              |
| Does the publication state whether it includes an availability statement or not? | Empirical studies § (n=211)  | Access to a comprehensive, detailed protocol is essential for accurate replication of a study.                                                                                                                                               |
| Which components does the protocol contain?                                      |                              |                                                                                                                                                                                                                                              |
| <b>Materials</b>                                                                 |                              |                                                                                                                                                                                                                                              |
| Does the publication state whether it includes a materials statement or not?     | Empirical studies ¶ (n=185)  | Lack of access to materials inhibits the quality and accuracy of a replication study.                                                                                                                                                        |
| Does the publication state how to retrieve an available materials statement?     |                              |                                                                                                                                                                                                                                              |
| Can these materials actually be accessed?                                        |                              |                                                                                                                                                                                                                                              |
| <b>Raw data</b>                                                                  |                              |                                                                                                                                                                                                                                              |
| Does the publication include a data availability statement?                      | Empirical studies § (n=211)  | The sharing of raw data allows for more accountability and increases the quality and efficiency of the replication.                                                                                                                          |
| How can the data be retrieved (e.g., upon request or via online repository)?     |                              |                                                                                                                                                                                                                                              |

|                                                                                                                                                                                                                                                                                                                                                                                                                                                                             |                               |                                                                                                                                                                                                             |
|-----------------------------------------------------------------------------------------------------------------------------------------------------------------------------------------------------------------------------------------------------------------------------------------------------------------------------------------------------------------------------------------------------------------------------------------------------------------------------|-------------------------------|-------------------------------------------------------------------------------------------------------------------------------------------------------------------------------------------------------------|
| Can the data be accessed?                                                                                                                                                                                                                                                                                                                                                                                                                                                   |                               |                                                                                                                                                                                                             |
| Does the data include all the raw data necessary?                                                                                                                                                                                                                                                                                                                                                                                                                           |                               |                                                                                                                                                                                                             |
| Is the data file clearly documented?                                                                                                                                                                                                                                                                                                                                                                                                                                        |                               |                                                                                                                                                                                                             |
| <b>Analysis scripts</b>                                                                                                                                                                                                                                                                                                                                                                                                                                                     |                               |                                                                                                                                                                                                             |
| Are the analysis scripts availability stated?                                                                                                                                                                                                                                                                                                                                                                                                                               | Empirical studies§<br>(n=211) | Analysis scripts contains a step-by-step of instructions needed to perform precise analyses, particularly via computer code such as Python or R, allowing a more accurate replication of the data analysis. |
| How can the analysis script be retrieved (e.g., upon request or via online repository)?                                                                                                                                                                                                                                                                                                                                                                                     |                               |                                                                                                                                                                                                             |
| Are the scripts accessible?                                                                                                                                                                                                                                                                                                                                                                                                                                                 |                               |                                                                                                                                                                                                             |
| <b>Pre-registration</b>                                                                                                                                                                                                                                                                                                                                                                                                                                                     |                               |                                                                                                                                                                                                             |
| Does the publication include a pre-registration statement?                                                                                                                                                                                                                                                                                                                                                                                                                  | Empirical studies§<br>(n=211) | Pre-registration limits reporting bias, including outcome switching and P-hacking.                                                                                                                          |
| Which registry did the publication use?                                                                                                                                                                                                                                                                                                                                                                                                                                     |                               |                                                                                                                                                                                                             |
| Is it possible to access the pre-registration?                                                                                                                                                                                                                                                                                                                                                                                                                              |                               |                                                                                                                                                                                                             |
| What content was available in the pre-registration?                                                                                                                                                                                                                                                                                                                                                                                                                         |                               |                                                                                                                                                                                                             |
| <p>†: ‘Empirical studies’ encompass the following study designs: cohort, case series, case reports, case-control, secondary analysis, chart review, commentaries [with data analysis], laboratory, and cross-sectional study designs, clinical trial.</p> <p>§: Includes empirical studies without case reports and case series</p> <p>¶: Includes empirical studies with case reports, case series, meta-analysis or systematic review, and commentaries with analysis</p> |                               |                                                                                                                                                                                                             |
